# Supplementary material for: New l-Rhamnose-Binding Lectin from the Bivalve Glycymeris yessoensis: Purification, Partial Structural Characterization and Antibacterial Activity
Source: MDPI journal article supplement (doi:10.3390/md22010027), 2023-12-29
Supplement: s1 [file s1]

Supporting Information

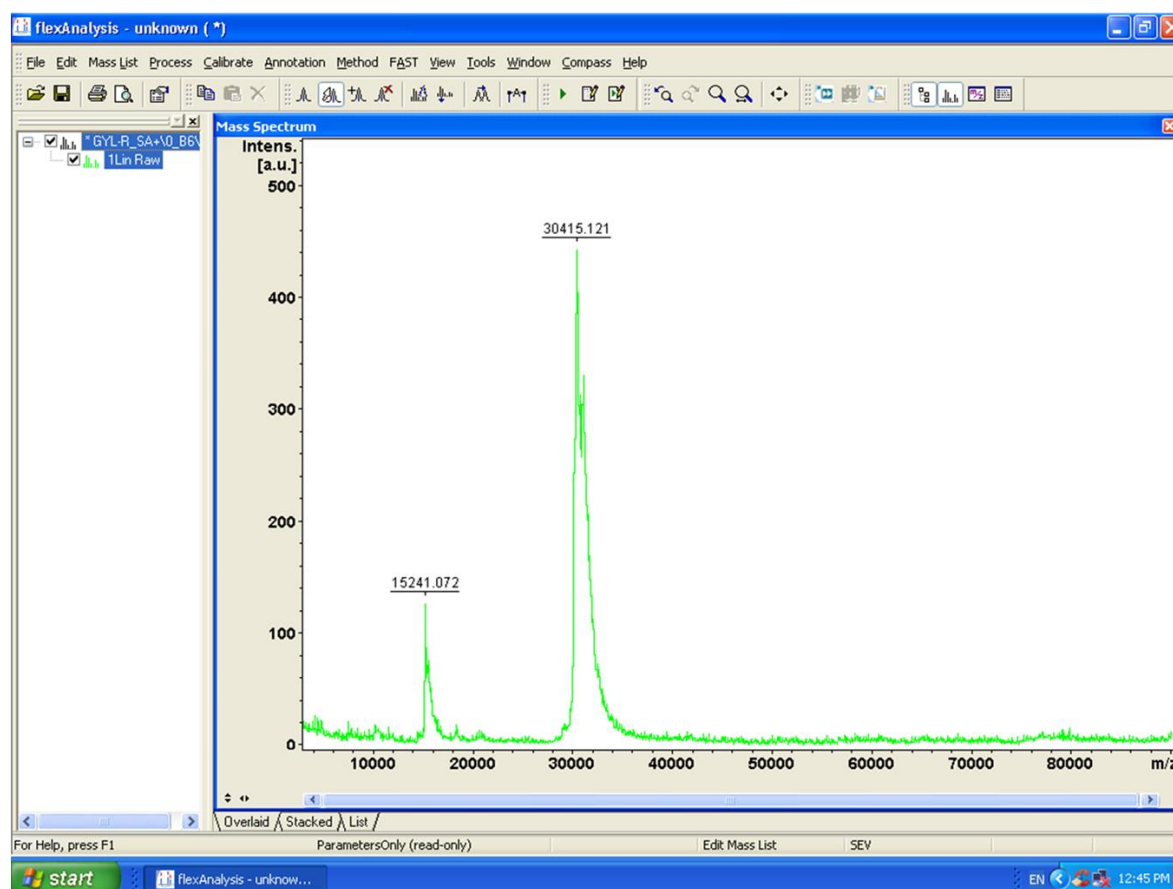

**Figure S1.** Molecular mass determination of GYL-R via MALDI-TOF mass spectrometry.

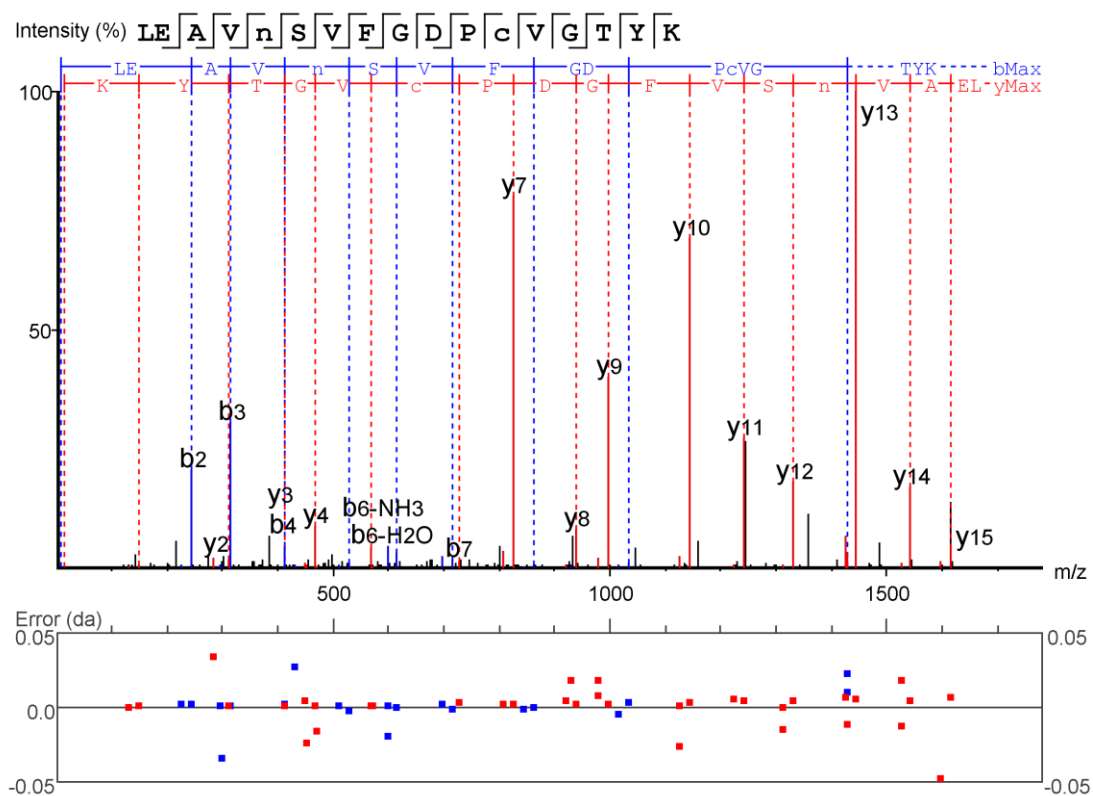

(A)

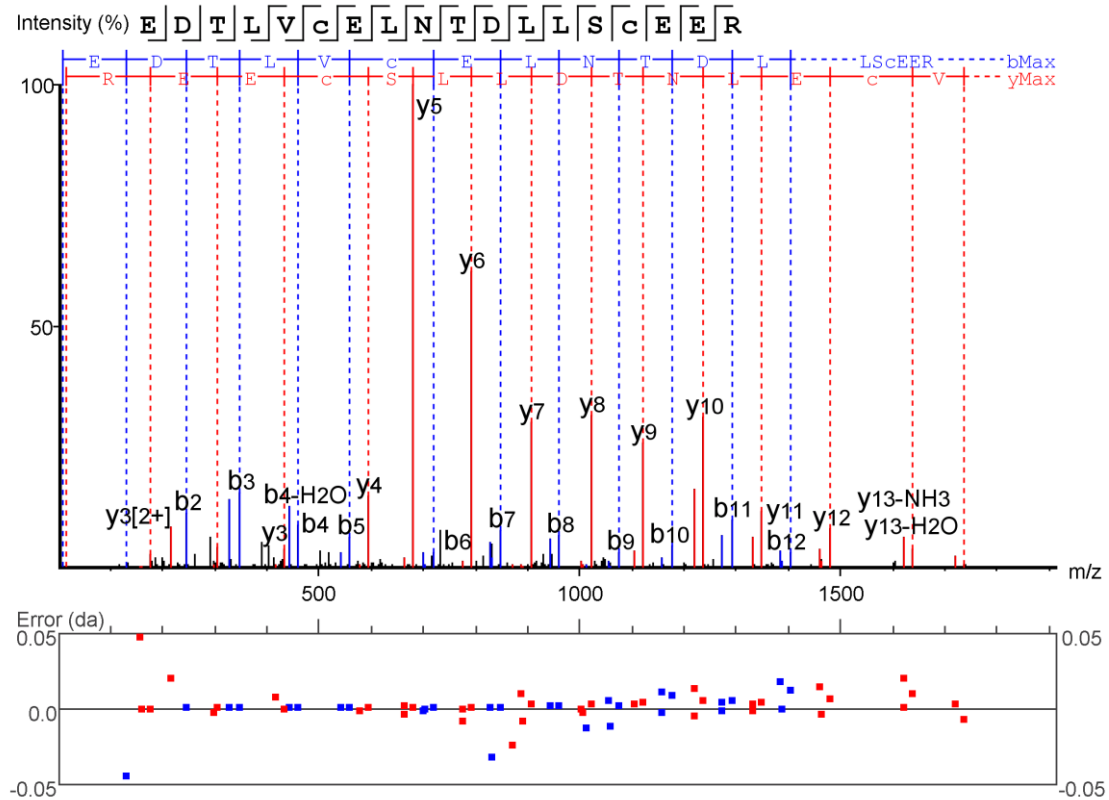

(B)

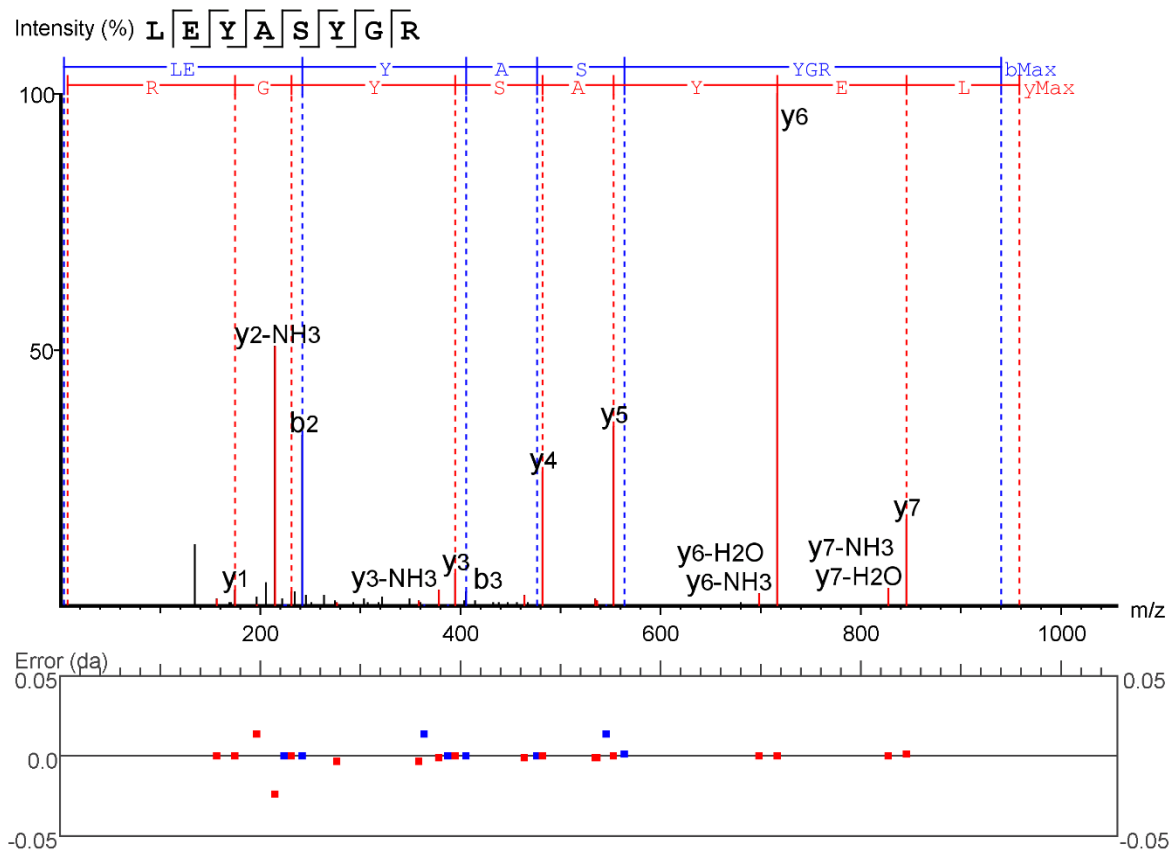

(C)

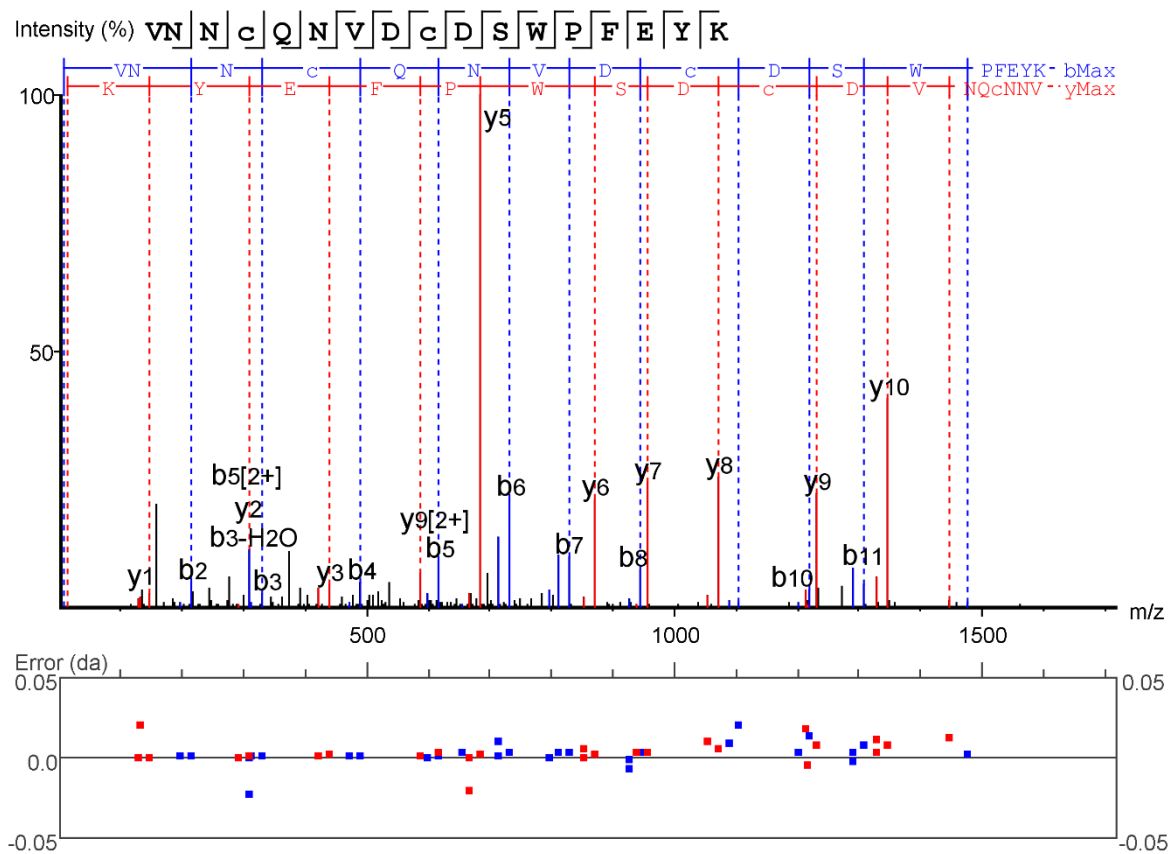

(D)

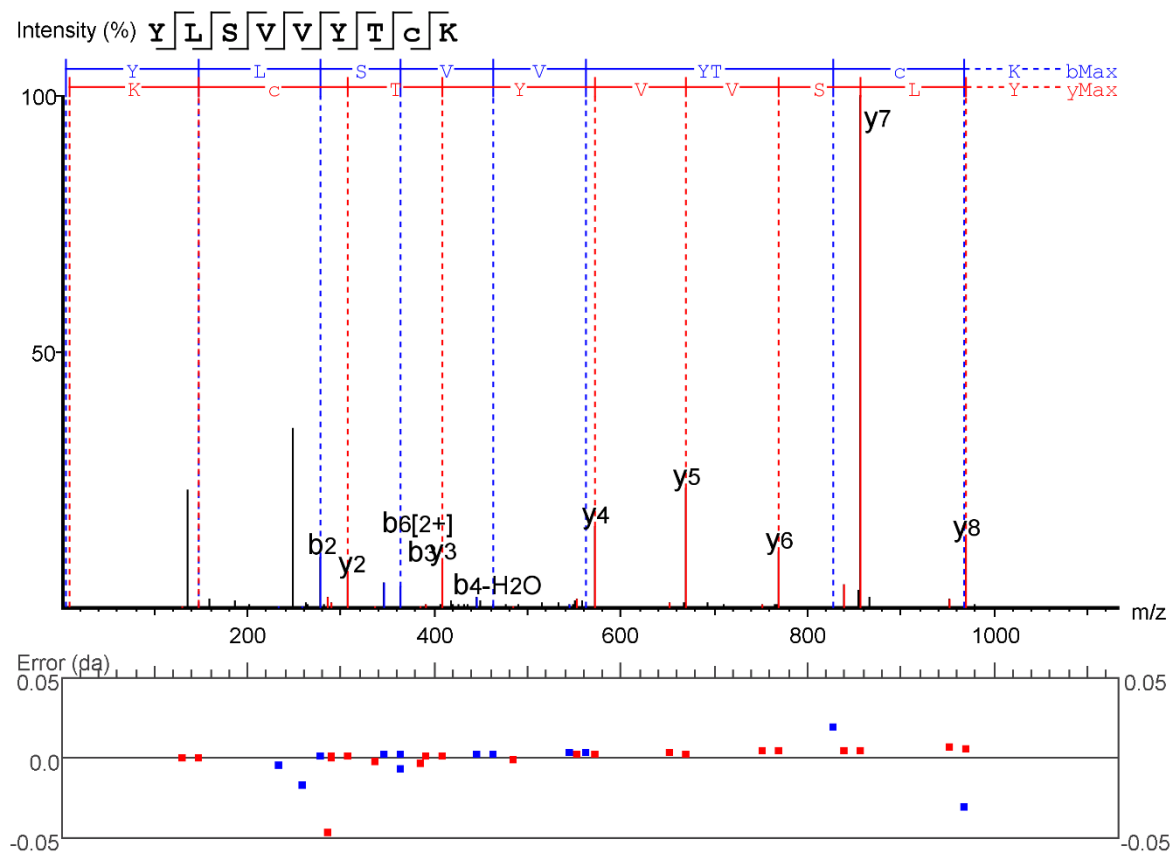

(E)

**Figure S2.** Spectral data showing fragmentation analysis of peptides of GYL-R. Small letters indicate modified amino acid residues (c – carbamidomethyl Cys, n – deamidation Asn). (**A**) peptide – LEAVNSVFGDPCVGT<sub>YK</sub>; (**B**) peptide - EDTLVCELNTDLLSCEER; (**C**) peptide – LEYASYGR; (**D**) peptide – VNNCQNVDCDSWPFE<sub>YK</sub>; (**E**) peptide - YLSVVYTCK.
